# Supplementary material for: Identification of Rare Genetic Variants in Familial Spontaneous Coronary Artery Dissection and Evidence for Shared Biological Pathways
Source: MDPI journal article supplement (doi:10.3390/jcdd10090393), 2023-09-12
Supplement: s1 [file s1]

SUPPLEMENTAL MATERIAL

| Gene Symbol<br>(Name)                           | rsID        | Variant     | Regulatory Site | gnomAD<br>MAF (%) | CADD<br>Score<br>(percentile) | FATHMM<br>-XF<br>(Non-coding pathogenicity) | Arterial Tissue<br>Expression- Rank |   |    | PPI<br>Talin 1=1,<br>GWAS=2 | CTD<br>/Aortic<br>Gene | Abnormal<br>Vascular<br>Phenotype<br>(MGI)                 | Vascular<br>Phenotype<br>(HGMD) | GWAS<br>Trait<br>(GWAS Cat.) |
|-------------------------------------------------|-------------|-------------|-----------------|-------------------|-------------------------------|---------------------------------------------|-------------------------------------|---|----|-----------------------------|------------------------|------------------------------------------------------------|---------------------------------|------------------------------|
| ATF4                                            |             |             |                 |                   |                               |                                             |                                     |   |    |                             |                        |                                                            |                                 |                              |
| (Activating transcription factor 4)             | rs571672362 | c.-277 C>T  | TFBS            | 0.099             | 13.3 (90)                     | 0.709                                       | 5                                   | 4 | 2  | 2                           | —                      | aorta morphology                                           | —                               | —                            |
| PDGFRA                                          |             |             |                 |                   |                               |                                             |                                     |   |    |                             |                        |                                                            |                                 |                              |
| (Platelet derived growth factor receptor alpha) | rs184179322 | c.*2496 A>G | miRNA binding   | 0.022             | 20.9 (95)                     | 0.834                                       | 9                                   | 6 | 22 | 1, 2                        | —                      | placenta vasculature, vasculogenesis, vitelline morphology | aortic arch anomaly             | —                            |

**Table S1.** Top candidate genes harboring non-coding variants in familial SCAD. Minor allele frequencies are based on all populations. Aor, aortopathy; CAD, coronary artery disease; CADD, combined annotation-dependent depletion; CTD, connective tissue disorder; CVD, cardiovascular disease; FATHMM, functional analysis through hidden Markov models; gnomAD, Genome Aggregation Database; GWAS, genome-wide association study; HGMD, Human Genome Mutation Database; miRNA, microRNA; MGI, Mouse Genome Informatics; PAH, pulmonary arterial hypertension; PPI, protein-protein interaction; TFBS, transcription factor binding sites. Asterisk denotes a 3' untranslated region.

|                                            |                             | SCAD-08                                                      | SCAD-10   | SCAD-11   |           |
|--------------------------------------------|-----------------------------|--------------------------------------------------------------|-----------|-----------|-----------|
|                                            |                             | n=2                                                          | n=2       | n=3       |           |
| Primary                                    | Variant                     | High Confidence                                              | 6,116,253 | 5,175,253 | 5,622,361 |
|                                            |                             | Rare - MAF <0.1%                                             | 687,345   | 260,161   | 404,778   |
|                                            |                             | Segregates with Arteriopathy                                 | 106,432   | 30,532    | 17,126    |
|                                            |                             | Regulatory Impact<br>(TFBS or miRNA coding/<br>binding site) | 6         | 8         | 5         |
|                                            |                             | Regulatory (CADD ≥7)                                         | 3         | 4         | 3         |
|                                            |                             | RegulomeDB (Ranking ≤3)                                      | 4         | 5         | 5         |
|                                            | ↓                           |                                                              |           |           |           |
| FATHMM-XF<br>(Non-coding pathogenic score) |                             | 1                                                            | 1         | 0         |           |
| ↓                                          |                             |                                                              |           |           |           |
| Secondary                                  | Gene                        | Arterial Tissue Expression<br>OR                             | 0         | ATF4      |           |
|                                            |                             | Overlapping Gene<br>OR                                       | 0         | 0         |           |
|                                            |                             | Protein-Protein Interaction<br>OR                            | PDGFRA    | 0         |           |
|                                            | ↓                           |                                                              |           |           |           |
|                                            | Gene-Disease<br>Association | CTD/Aortopathy Gene<br>OR                                    | 0         | 0         |           |
|                                            |                             | Mouse Vascular Phenotype<br>OR                               | PDGFRA    | ATF4      |           |
|                                            |                             | Human Vascular Phenotype<br>OR                               | PDGFRA    | 0         |           |
|                                            |                             | GWAS Vascular Trait                                          | 0         | 0         |           |
| ↓                                          |                             |                                                              |           |           |           |
| Prioritized Candidate Gene                 |                             | PDGFRA                                                       | ATF4      | —         |           |

**Figure S1.** Non-coding variant filtering and gene prioritization workflow identifies additional candidate genes for familial SCAD. A non-coding variant filtering scheme applied to all single-nucleotide variants and insertions/deletions in families SCAD-08, SCAD-10 and SCAD-11 identified two genes in two families. Abbreviations: CADD, Combined Annotation Dependent Depletion; CTD, connective tissue disorder; GWAS, genome-wide association study; MAF, minor allele frequency; pLI, probability of loss-of-function; SCAD, spontaneous coronary artery dissection.

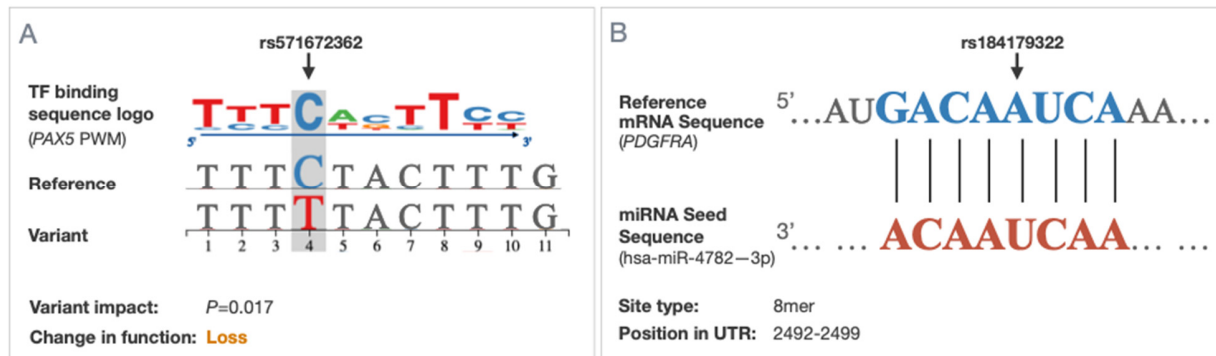

**Figure S2.** Non-coding variants in familial SCAD alter transcription factor and microRNA binding sites. **A**, A composite logo plot (represented with position weight matrices – letter heights indicate sequence conservation at that position) of a binding site within the 5' untranslated region of the non-coding candidate *ATF4* for the transcription factor *PAX5*. The rs571672362-T variant is predicted to cause a loss of function and prevent binding of *PAX5* according to atSNP [78]. **B**, A predicted microRNA binding site and seed sequence of miR-4782-3p overlapping rs184179322 within the non-coding familial candidate *PDGFRA* [79].

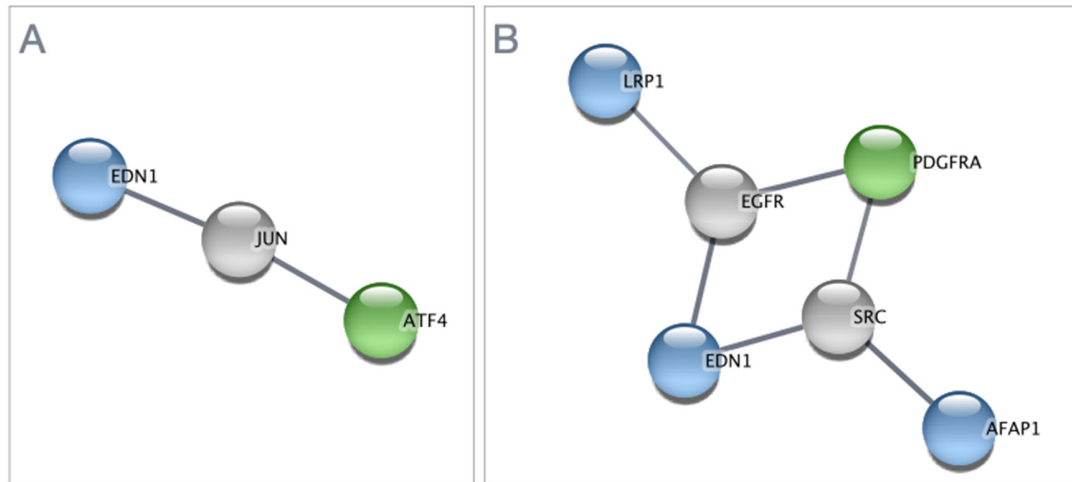

**Figure S3.** Functional associations between individual F-SCAD non-coding candidates and previously reported SCAD genes. GWAS-derived candidate gene proteins EDN1, LRP1, and AFAP1 (blue) interact with two of the prioritized non-coding candidates (Panel A, ATF4; Panel B, PDGFRA) for familial SCAD (green) through a STRING 2nd shell interactor protein (grey). STRING analysis was set at a high confidence score (0.7).

A

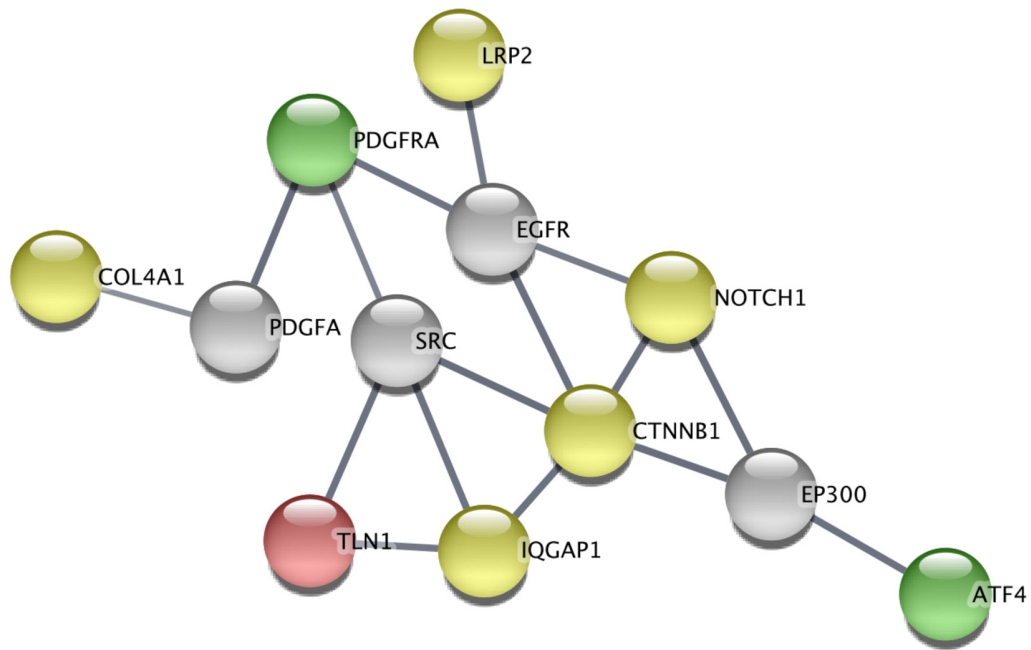

B

| Protein-Protein Interaction | Confidence Score | Textmining  | Database    | Coexpression | Experiments |
|-----------------------------|------------------|-------------|-------------|--------------|-------------|
| ATF4_EP300_CTNNB1           | 0.969/0.999      | 0.432/0.989 | 0.800/0.900 | —/0.054      | 0.753/0.897 |
| ATF4_EP300_NOTCH1           | 0.969/0.997      | 0.432/0.906 | 0.800/0.900 | —/0.062      | 0.753/0.678 |
| PDGFRA_PDGFA_COL4A1         | 0.999/0.772      | 0.976/0.282 | 0.900/0.600 | —            | 0.875/0.270 |
| PDGFRA_SRC_TLN1             | 0.849/0.974      | 0.517/0.609 | 0.800/0.900 | 0.062/0.083  | 0.122/0.270 |
| PDGFRA_SRC_IQGAP1           | 0.849/0.966      | 0.517/0.561 | 0.800/0.900 | 0.062/0.062  | 0.122/0.270 |
| PDGFRA_SRC_CTNNB1           | 0.849/0.999      | 0.517/0.978 | 0.800/0.900 | 0.062/0.060  | 0.122/0.678 |
| PDGFRA_EGFR_LRP2            | 0.958/0.920      | 0.747/0.211 | 0.800/0.900 | 0.098/0.063  | 0.642/0.057 |
| PDGFRA_EGFR_NOTCH1          | 0.958/0.834      | 0.747/0.756 | 0.800/—     | 0.098/—      | 0.642/0.229 |
| PDGFRA_EGFR_CTNNB1          | 0.958/0.999      | 0.747/0.984 | 0.800/0.900 | 0.098/0.062  | 0.642/0.715 |

**Figure S4.** Network interactome of functional associations among F-SCAD non-coding and coding candidates. **A**, Protein-protein interactions in two of the familial non-coding prioritized candidates (green) and six of the familial coding candidate (yellow) and talin 1 (red) through a STRING 2nd shell interactor (grey). **B**, Shared protein-protein interactions had a high confidence score of <0.8.

## Supplemental References

78. Zuo, C.; Shin, S.; Keles, S. atSNP: transcription factor binding affinity testing for regulatory SNP detection. *Bioinformatics*. **2015**, 31, 3353-3355, doi:10.1093/bioinformatics/btv328.
79. McGeary, S.; Lin, K.; Shi, C.; Pham, T.; Bisaria, N.; Kelley, G.; Bartel, D. The biochemical basis of microRNA targeting efficacy. *Science*. **2019**, 366, eaav1741, doi:10.1126/science.aav1741.
